# Supplementary material for: Vibrational properties and specific heat of core–shell Ag–Au icosahedral nanoparticles
Source: Royal Society of Chemistry journal article supplement (doi:10.1039/c5cp00232j), 2015-01-01
Supplement: c5cp00232j1.pdf [file c5cp00232j1.pdf]

## SUPPORTING INFORMATION

# Vibrational Properties and Specific Heat of Core-Shell

## Ag-Au Icosahedral Nanoparticles

*Huziel E. Saucedo<sup>1</sup> and Ignacio L. Garzón<sup>1\*</sup>*

<sup>1</sup>Instituto de Física, Universidad Nacional Autónoma de México,

Apartado Postal 20-364, 01000 México, D. F., México

### Part I. Parameters of the Many-Body Gupta Potential.

To model the metallic bonding in the systems under study the  $n$ -body Gupta potential was used. Such potential for a bimetallic system is given by:

$$U(\{r_k\}) = \sum_{i=1}^N U_i = \sum_{i=1}^N \left\{ \sum_{j \neq i}^N \epsilon_{ij} e^{-p_{ij}(r_{ij}/r_{ij}^0-1)} - \left[ \sum_{j \neq i}^N \zeta_{ij}^2 e^{-2q_{ij}(r_{ij}/r_{ij}^0-1)} \right]^{1/2} \right\}$$

The parameters  $\epsilon_{ij}$ ,  $\zeta_{ij}$ ,  $p_{ij}$ ,  $q_{ij}$  and  $r_{ij}^0$  are fitted to bulk material properties. In this paper, a set of parameters fitted by Cleri and Rosato<sup>1</sup> were used in the case of homoatomic interactions, while for Au-Ag interactions, a combination of geometrical and arithmetical averages of the pure metal parameters were used. These parameters are shown in Table S1.

There is another set of parameters recently used by Calvo<sup>2,3</sup> to compute the frequencies of metal nanoalloys. This second set of parameters were obtained by

Rapallo *et al.*<sup>4</sup> for the Au-Au interaction and in the case of the Ag-Ag one, the parameters were fitted by Baletto *et al.*<sup>5</sup> For the Au-Ag interaction, the parameters were fitted by Rapallo *et al.*<sup>4</sup> to the solubility energies in the case of  $\epsilon_{ij}$  and  $\zeta_{ij}$ , and for the  $p_{ij}$  and  $q_{ij}$ , an arithmetic average of the pure values was carried out.

**Table S1.** Parameters of the Gupta potential. The parameters used in this work are the values fitted by Cleri and Rosato<sup>1</sup> and their geometric and arithmetic averages for the heteroatomic interaction. Other parameter values were obtained by Rapallo *et al.* (Au-Au),<sup>4</sup> Baletto *et al.* (Ag-Ag)<sup>5</sup>, and Rapallo *et al.* (Au-Ag).<sup>4</sup>

| Material         | $\epsilon_{ij}$ [eV] | $\zeta_{ij}$ [eV]   | $p_{ij}$            | $q_{ij}$           | $r_{ij}^0[\text{\AA}]$ | Refs.        |
|------------------|----------------------|---------------------|---------------------|--------------------|------------------------|--------------|
| Au-Au            | 0.2061               | 1.790               | 10.229              | 4.036              | 2.884                  | <sup>1</sup> |
| Ag-Ag            | 0.1028               | 1.178               | 10.928              | 3.139              | 2.889                  | <sup>1</sup> |
| Au-Ag            | 0.1456 <sup>a</sup>  | 1.4521 <sup>a</sup> | 10.579 <sup>b</sup> | 3.588 <sup>b</sup> | 2.8865 <sup>c</sup>    | This work    |
| Au-Au (in Au-Ag) | 0.2096               | 1.8153              | 10.139              | 4.033              | 2.884                  | <sup>4</sup> |
| Ag-Ag            | 0.1031               | 1.1899              | 10.85               | 3.18               | 2.889                  | <sup>5</sup> |
| Au-Ag            | 0.149                | 1.4874              | 10.494 <sup>b</sup> | 3.607 <sup>b</sup> | 2.8865 <sup>c</sup>    | <sup>4</sup> |

---

<sup>a</sup>  $\epsilon_{AB} = \sqrt{\epsilon_A \epsilon_B}$  and  $\zeta_{AB} = \sqrt{\zeta_A \zeta_B}$ .

<sup>b</sup>  $p_{AB} = (p_A + p_B)/2$  and  $q_{AB} = (q_A + q_B)/2$ .

<sup>c</sup>  $r_{AB} = (r_A + r_B)/2$ .

## Part II. Vibrational density of states (VDOS) of bimetallic nanoparticles

Here it is shown the VDOS for 561- (Fig. S1), 309- (Fig. S2) and 147-atoms (Fig. S3) bimetallic nanoparticles.

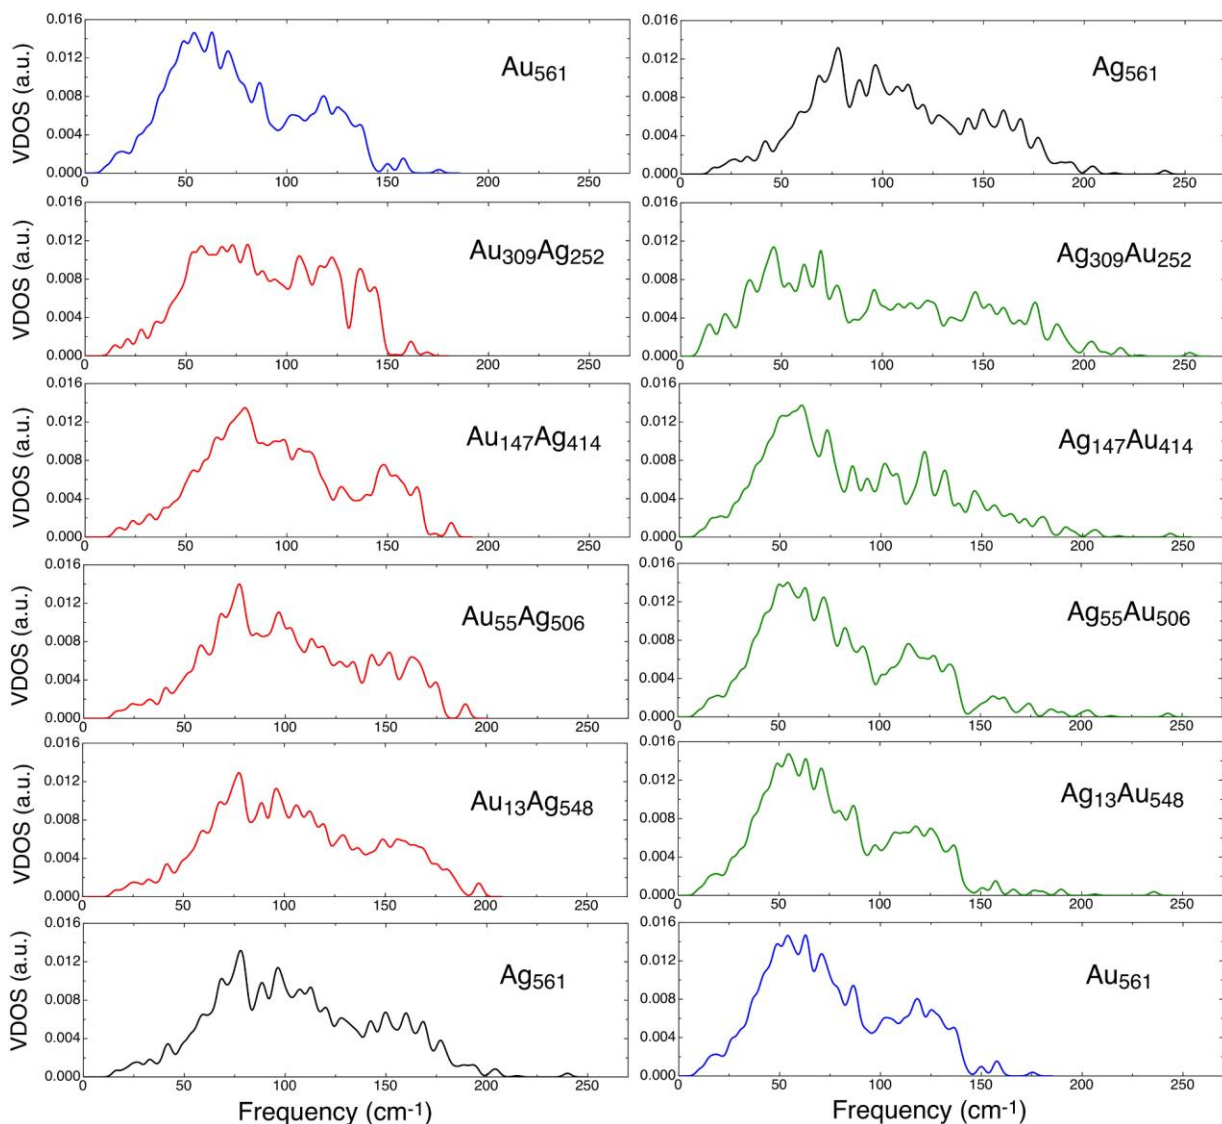

**Figure S1.** Vibrational density of states (VDOS) for the 561-atom bimetallic icosahedral Au<sub>core</sub>-Ag<sub>shell</sub> (left panels) and Ag<sub>core</sub>-Au<sub>shell</sub> (right panels) nanoparticles with different core-shell compositions. The VDOS for the pure Au<sub>561</sub> and Ag<sub>561</sub> icosahedral nanoparticles are also displayed for comparison.

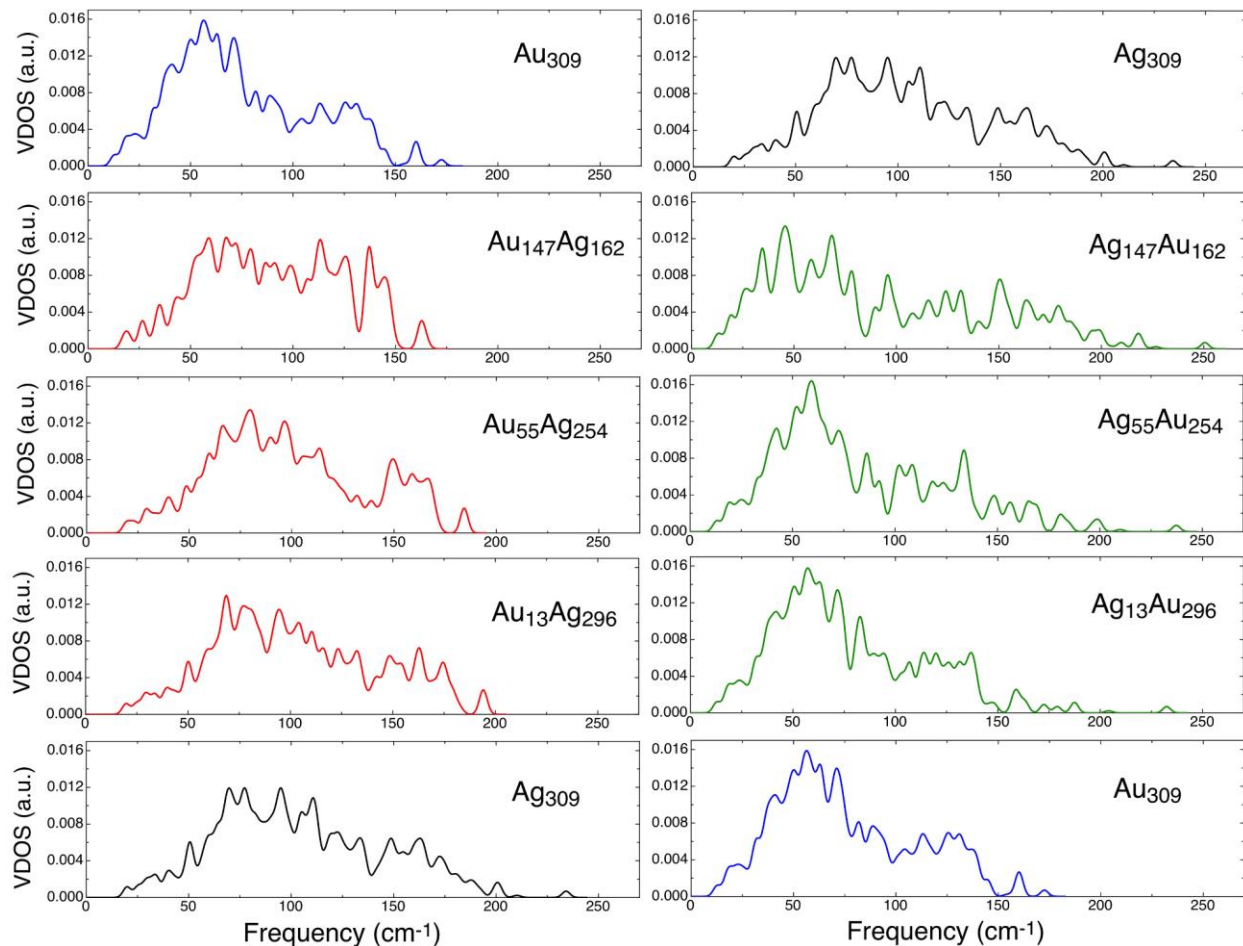

**Figure S2.** Vibrational density of states (VDOS) for the 309-atom bimetallic icosahedral  $\text{Au}_{\text{core}}\text{-Ag}_{\text{shell}}$  (left panels) and  $\text{Ag}_{\text{core}}\text{-Au}_{\text{shell}}$  (right panels) nanoparticles with different core-shell compositions. The VDOS for the pure  $\text{Au}_{309}$  and  $\text{Ag}_{309}$  icosahedral nanoparticles are also displayed for comparison.

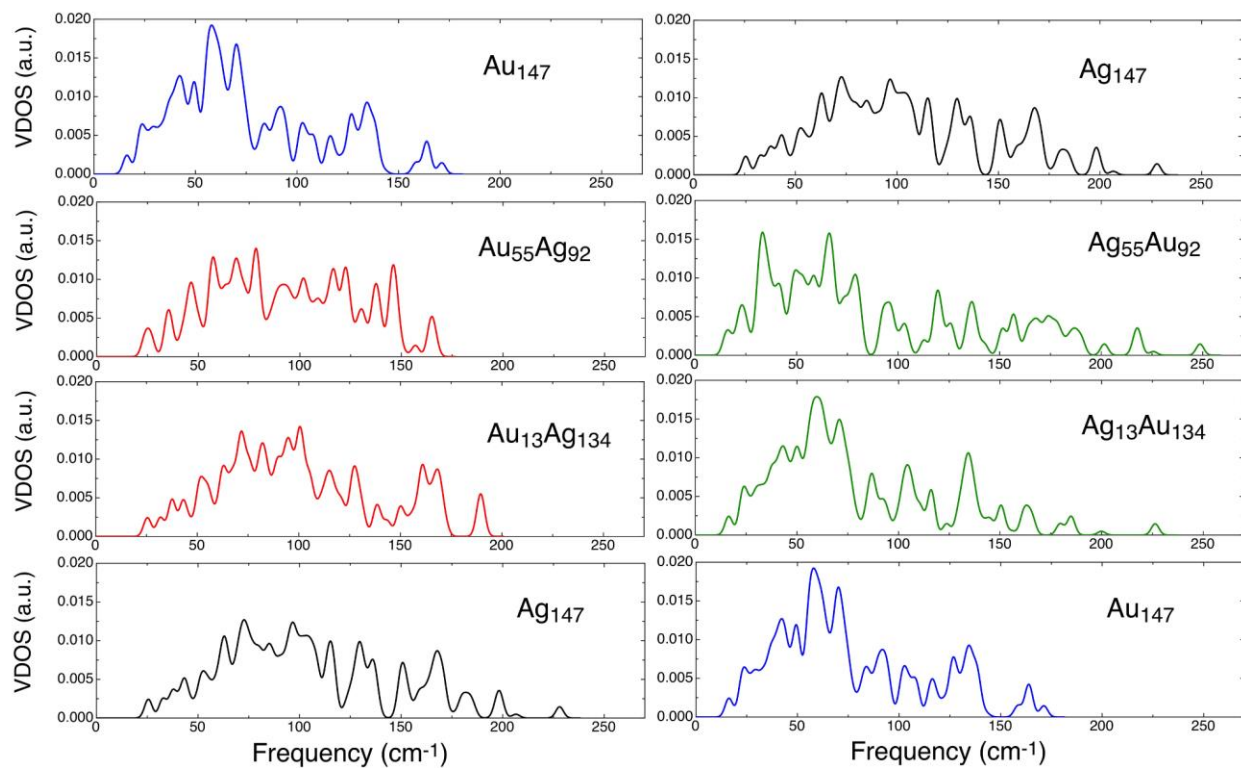

**Figure S3.** Vibrational density of states (VDOS) for the 147-atom bimetallic icosahedral  $\text{Au}_{\text{core}}\text{-Ag}_{\text{shell}}$  (left panels) and  $\text{Ag}_{\text{core}}\text{-Au}_{\text{shell}}$  (right panels) nanoparticles with different core-shell compositions. The VDOS for the pure  $\text{Au}_{147}$  and  $\text{Ag}_{147}$  icosahedral nanoparticles are also displayed for comparison.

### Part III. Specific heat of bimetallic nanoparticles

The specific heat as a function of temperature is displayed for all 923-atom core-shell Ag-Au icosahedral nanoparticles showed in Fig. 1. The data in Fig. 1 shows a smooth transition between the pure metal nanoparticles. The only case that does not follow this trend is the  $\text{Ag}_{561}\text{Au}_{362}$  nanoparticle with Ag core.

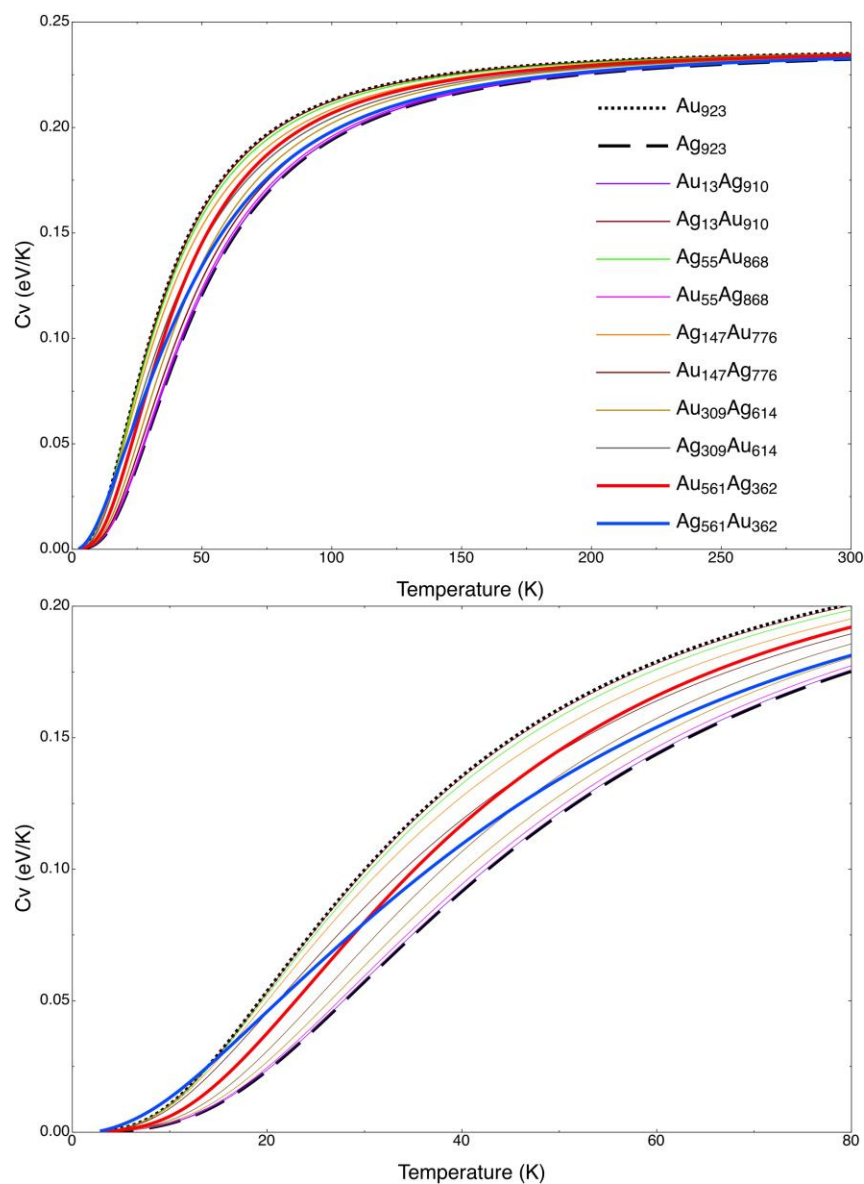

**Figure S4.** Low-temperature dependence of the specific heat of core-shell bimetallic icosahedral nanoparticles. The bottom panel shows the specific heat in a smaller range of temperature.

## References

- 1 F. Cleri and V. Rosato, *Phys. Rev. B*, 1993, **48**, 22.
- 2 F. Calvo, *J. Phys. Chem. C*, 2011, **115**, 17730.
- 3 F. Calvo, *J. Phys. Chem. C*, 2012, **116**, 7607.
- 4 A. Rapallo, G. Rossi, R. Ferrando, A. Fortunelli, B. C. Curley, L. D. Lloyd, G. M. Tarbuck and R. L. Johnston, *J. Chem. Phys.*, 2005, **122**, 194308.
- 5 F. Baletto, C. Mottet and R. Ferrando, *Phys. Rev. B*, 2002, **66**, 155420.
